# Supplementary material
Source: PubMed Central journal article supplement (PMC5783656)
Supplement: EHP634.s001.acco.pdf [file EHP634.s001.acco.pdf]

**Note to readers with disabilities:** *EHP* strives to ensure that all journal content is accessible to all readers. However, some figures and Supplemental Material published in *EHP* articles may not conform to [508 standards](#) due to the complexity of the information being presented. If you need assistance accessing journal content, please contact [ehponline@niehs.nih.gov](mailto:ehponline@niehs.nih.gov). Our staff will work with you to assess and meet your accessibility needs within 3 working days.

## **Supplemental Material**

# **Adaptation to Climate Change: A Comparative Analysis of Modeling Methods for Heat-Related Mortality**

Simon N. Gosling , David M. Hondula , Aditi Bunker , Dolores Ibarreta , Junguo Liu , Xinxin Zhang , and Rainer Sauerborn

### **Table of Contents**

**Table S1.** K-S statistics between present and future warm season daily  $AT_{max}$  distributions for each city. The best match for each city is shaded.

## Supplemental Material

|                                         |           | Future AT <sub>max</sub> Distributions |          |          |           |        |       |       |        |       |           |       |          |        |
|-----------------------------------------|-----------|----------------------------------------|----------|----------|-----------|--------|-------|-------|--------|-------|-----------|-------|----------|--------|
|                                         |           | Athens                                 | Budapest | Helsinki | Ljubljana | London | Milan | Paris | Prague | Rome  | Stockholm | Turin | Valencia | Zurich |
| Present AT <sub>max</sub> Distributions | Athens    | 0.487                                  | 0.137    | 0.434    | 0.165     | 0.354  | 0.338 | 0.200 | 0.139  | 0.356 | 0.441     | 0.479 | 0.439    | 0.194  |
|                                         | Budapest  | 0.703                                  | 0.497    | 0.084    | 0.312     | 0.136  | 0.592 | 0.293 | 0.342  | 0.628 | 0.083     | 0.155 | 0.678    | 0.283  |
|                                         | Dublin    | 0.916                                  | 0.804    | 0.520    | 0.680     | 0.579  | 0.825 | 0.673 | 0.699  | 0.868 | 0.542     | 0.456 | 0.922    | 0.664  |
|                                         | Helsinki  | 0.870                                  | 0.742    | 0.413    | 0.600     | 0.480  | 0.765 | 0.586 | 0.620  | 0.795 | 0.436     | 0.347 | 0.875    | 0.576  |
|                                         | Ljubljana | 0.823                                  | 0.678    | 0.293    | 0.517     | 0.379  | 0.724 | 0.504 | 0.535  | 0.745 | 0.320     | 0.228 | 0.828    | 0.493  |
|                                         | London    | 0.854                                  | 0.720    | 0.377    | 0.575     | 0.451  | 0.751 | 0.561 | 0.595  | 0.776 | 0.402     | 0.305 | 0.858    | 0.550  |
|                                         | Milan     | 0.637                                  | 0.363    | 0.160    | 0.191     | 0.092  | 0.515 | 0.137 | 0.226  | 0.551 | 0.144     | 0.222 | 0.595    | 0.161  |
|                                         | Paris     | 0.785                                  | 0.628    | 0.236    | 0.466     | 0.328  | 0.683 | 0.454 | 0.484  | 0.711 | 0.262     | 0.177 | 0.784    | 0.443  |
|                                         | Prague    | 0.742                                  | 0.575    | 0.171    | 0.411     | 0.266  | 0.639 | 0.395 | 0.424  | 0.673 | 0.199     | 0.116 | 0.738    | 0.382  |
|                                         | Rome      | 0.617                                  | 0.317    | 0.270    | 0.164     | 0.167  | 0.492 | 0.078 | 0.198  | 0.527 | 0.253     | 0.310 | 0.573    | 0.130  |
|                                         | Stockholm | 0.876                                  | 0.750    | 0.412    | 0.606     | 0.485  | 0.773 | 0.592 | 0.628  | 0.804 | 0.438     | 0.341 | 0.882    | 0.581  |
|                                         | Turin     | 0.950                                  | 0.848    | 0.587    | 0.726     | 0.632  | 0.867 | 0.721 | 0.748  | 0.911 | 0.605     | 0.523 | 0.955    | 0.713  |
|                                         | Valencia  | 0.566                                  | 0.229    | 0.372    | 0.128     | 0.282  | 0.422 | 0.130 | 0.145  | 0.452 | 0.372     | 0.413 | 0.520    | 0.140  |
|                                         | Zurich    | 0.805                                  | 0.660    | 0.276    | 0.501     | 0.364  | 0.705 | 0.489 | 0.521  | 0.729 | 0.303     | 0.213 | 0.809    | 0.478  |

Table S1. K-S statistics between present and future warm season daily AT<sub>max</sub> distributions for each city. The best match for each city is shaded.
